# Supplementary material for: Targeting CXCR4 abrogates resistance to trastuzumab by blocking cell cycle progression and synergizes with docetaxel in breast cancer treatment
Source: Springer Nature journal article supplement (doi:10.1186/s13058-023-01665-w), 2023-06-06
Supplement: MOESM1 [file 25455728]

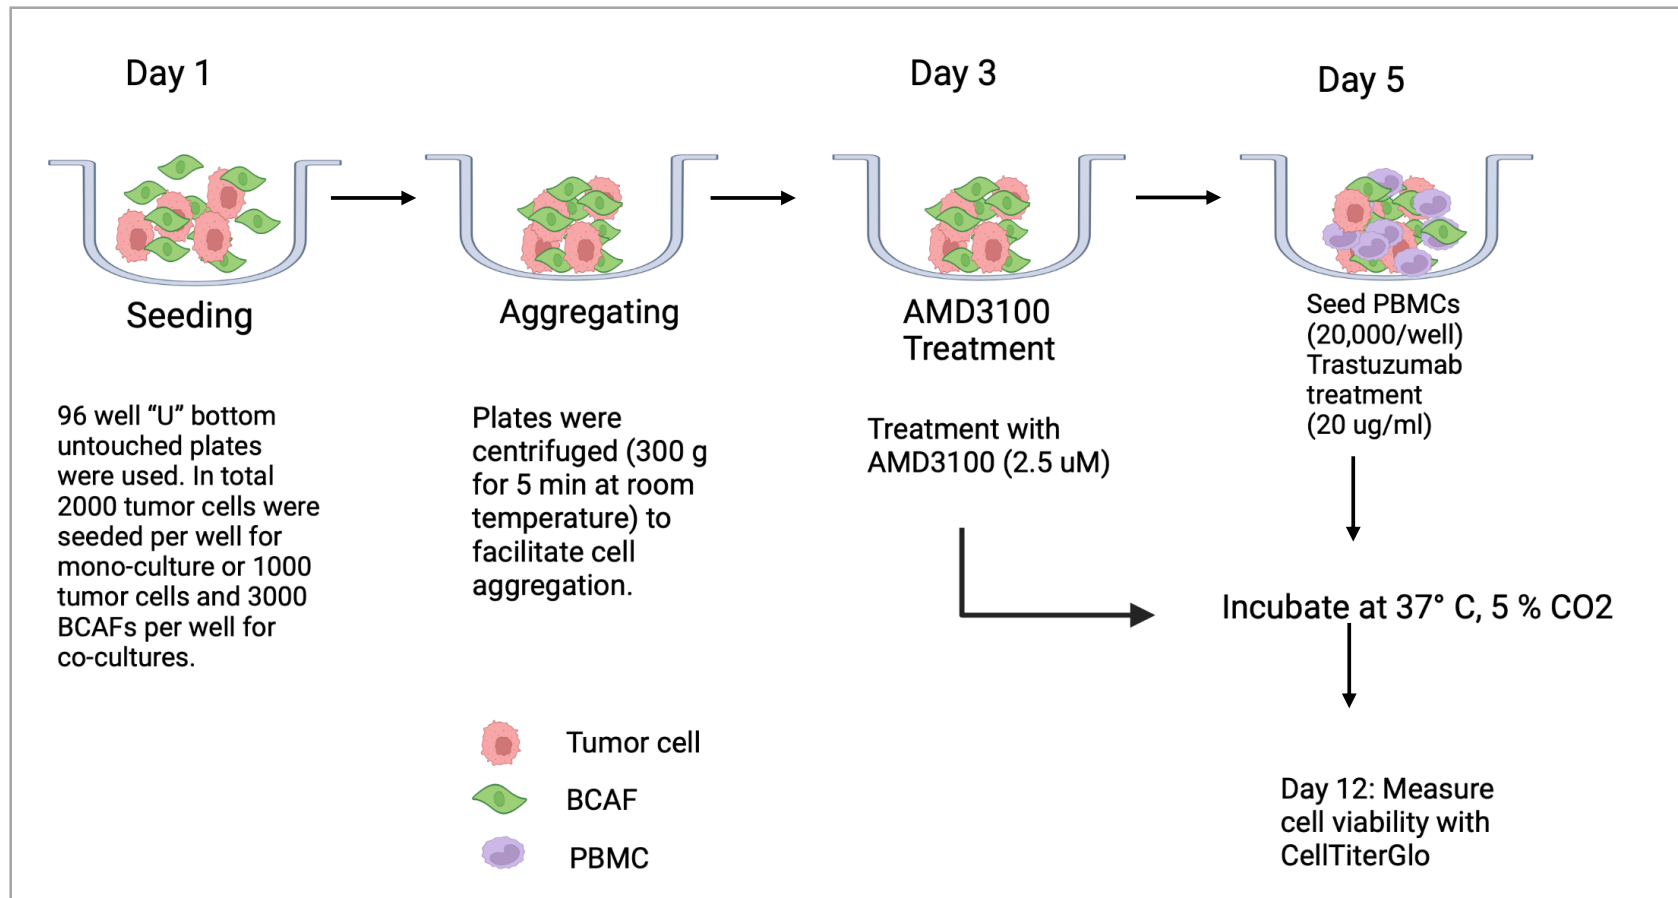

Fig. S1. **Illustration of 3D co-culture.** BTRT or SKRT cells were cocultured with BCAFs in 96 well "U" bottom unattached plates. The spheres were treated with AMD3100 (2.5  $\mu$ M) on day 3. For three line-co-culture, PBMCs were seeded on day 5, followed by treatment with trastuzumab (20  $\mu$ g/ml). Cell viability was detected with CellTiterGlo.
