# Supplementary material for: Targeting CXCR4 abrogates resistance to trastuzumab by blocking cell cycle progression and synergizes with docetaxel in breast cancer treatment
Source: Springer Nature journal article supplement (doi:10.1186/s13058-023-01665-w), 2023-06-06

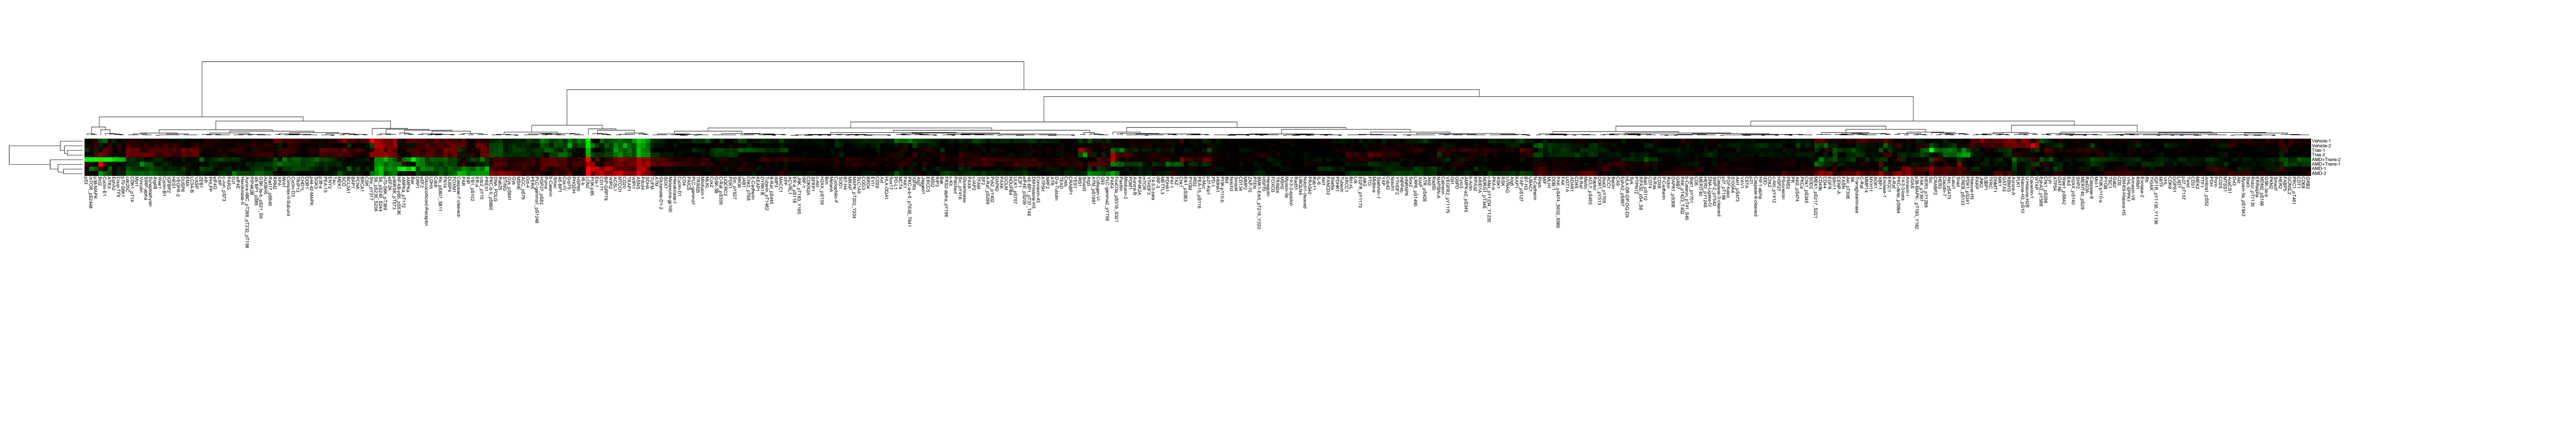

Supplement: MOESM3 [file 25455728]
