# Supplementary material for: Targeting CXCR4 abrogates resistance to trastuzumab by blocking cell cycle progression and synergizes with docetaxel in breast cancer treatment
Source: Springer Nature journal article supplement (doi:10.1186/s13058-023-01665-w), 2023-06-06
Supplement: MOESM4 [file 25455728]

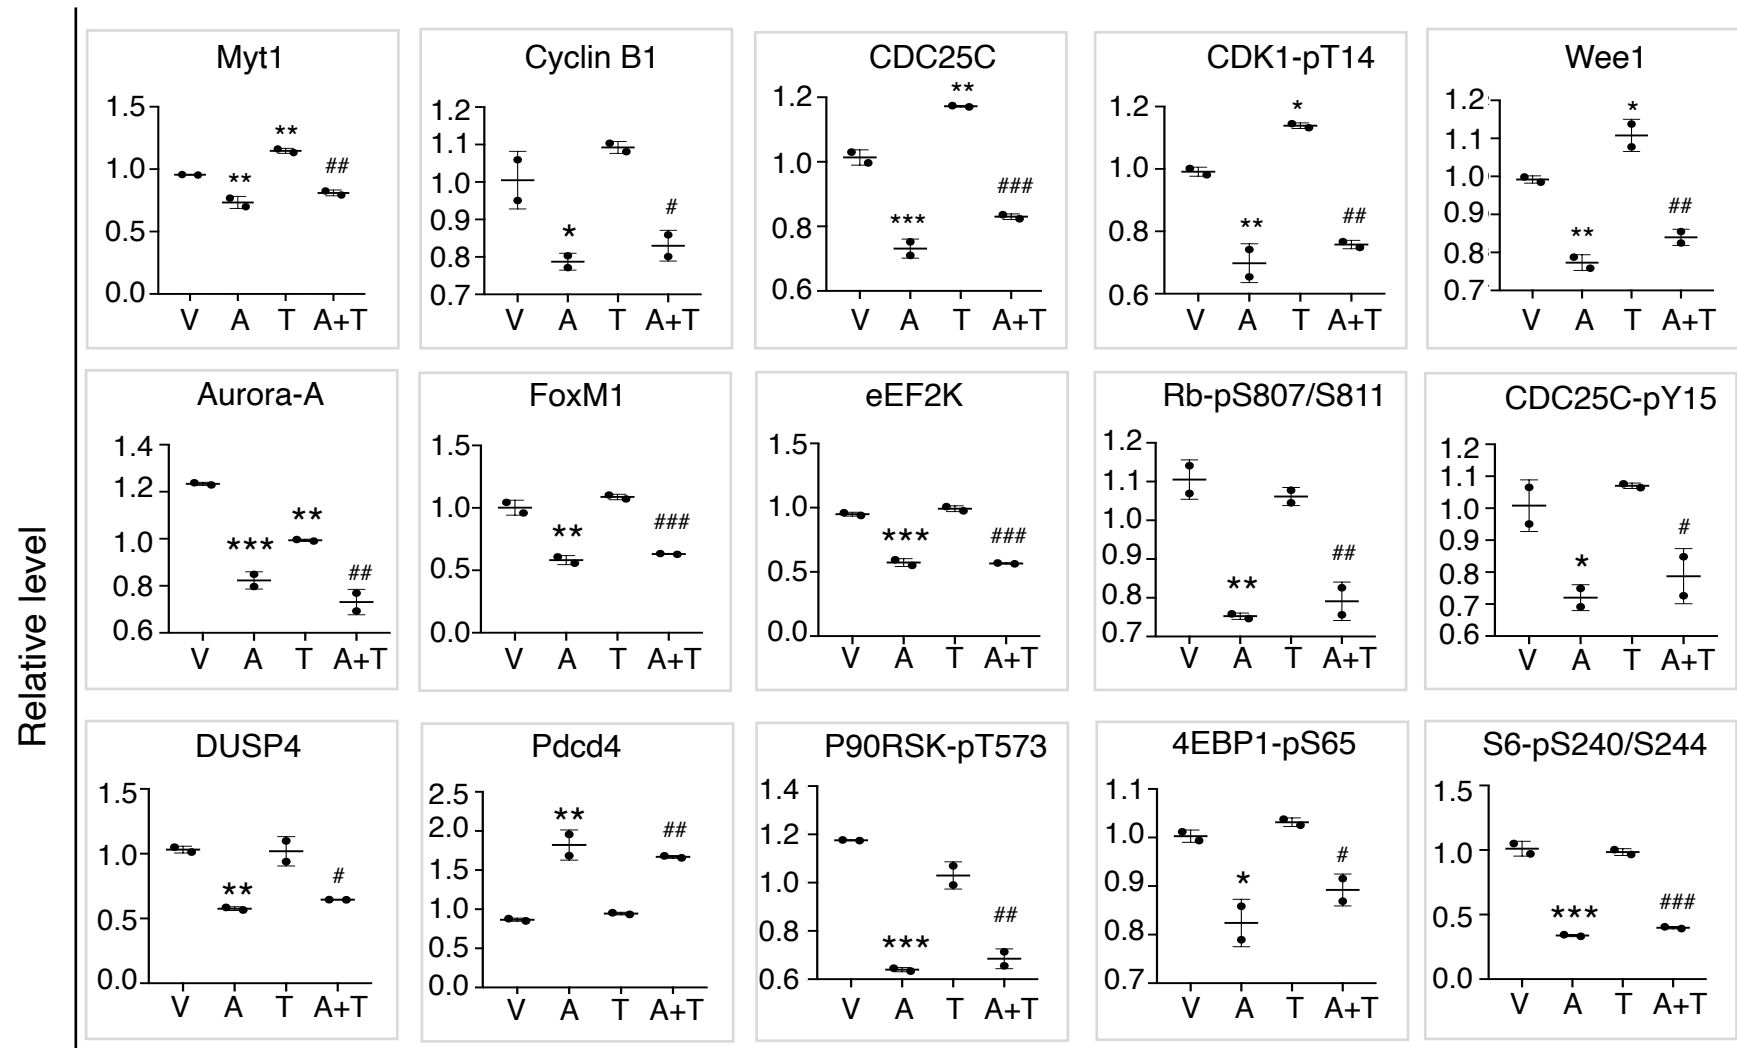

Fig. S4. **Effect of AMD3100 on pathways.** BTRT cells grown in 3D Matrigel culture were treated with vehicle (V), AMD3100 (A; 10 μM), trastuzumab (T; 20 μg/ml), or their combination (A+T). Cell lysates were subject to RPPA (Materials and Methods, Fig. 5A). A portion of the RPPA data were further analyzed with one-way ANOVA (mean ± SD; P value based on log<sub>2</sub> data: \*P < 0.05, \*\*P < 0.01, \*\*\*P < 0.001 compared with the vehicle; #P < 0.05, ##P < 0.01, ###P < 0.001 compared with trastuzumab).
