# Supplementary material for: Targeting CXCR4 abrogates resistance to trastuzumab by blocking cell cycle progression and synergizes with docetaxel in breast cancer treatment
Source: Springer Nature journal article supplement (doi:10.1186/s13058-023-01665-w), 2023-06-06
Supplement: MOESM5 [file 25455728]

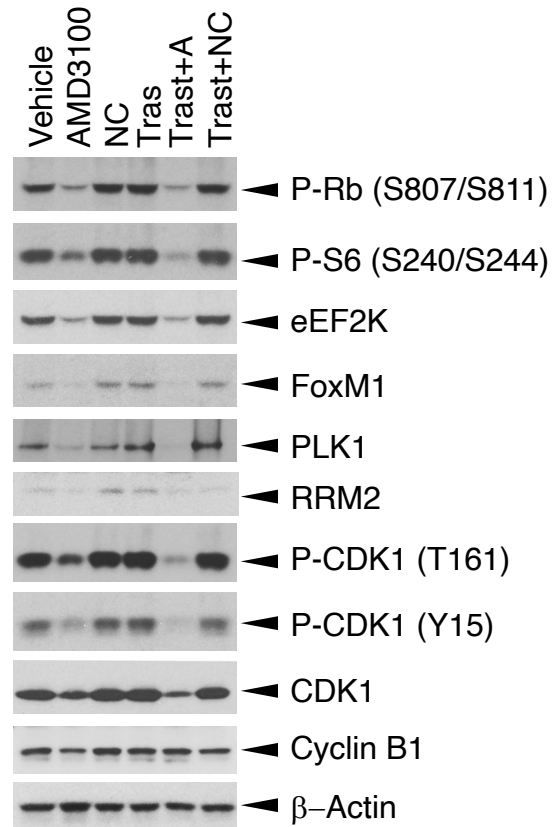

**Fig. S5. Western Blot.** BTRT cells grown in 3D Matrigel culture were treated with vehicle, AMD3100 (10 $\mu$ M), trastuzumab (20  $\mu$ g/ml), or their combination. SDF-1 $\alpha$  (4 ng/ml) was added at the same time ( Material and Methods). A polypeptide that was designed as a CXCR4 antagonist but did not show biological function in the HER2+ breast cancer cells was used as a negative control (NC).
