# Supplementary material for: Targeting CXCR4 abrogates resistance to trastuzumab by blocking cell cycle progression and synergizes with docetaxel in breast cancer treatment
Source: Breast Cancer Res. 2023 Jun 6;25:62. doi: 10.1186/s13058-023-01665-w (PMC10245436; doi:10.1186/s13058-023-01665-w)
Supplement: Supplementary file 9 — Additional file 9. Table S1: Antibodies used for RPPA and western blot. [file 13058_2023_1665_MOESM9_ESM.xlsx]

## Sheet: Sheet1
Table S1. Antibodies used for RPPA and Western blot
Antibody Name	Company	Validation Status
14-3-3-beta	CST1	Valid
14-3-3-epsilon	Santa Cruz2	Caution
14-3-3-zeta	Santa Cruz	Valid
4E-BP1	CST	Valid
4E-BP1_pS65	CST	Valid
4E-BP1_pT37_T46	CST	Valid
53BP1	CST	Valid
A-Raf	CST	Valid
A-Raf_pS299	Invitrogen3	Caution
ACC1	Abcam4	Caution
ACC_pS79	CST	Valid
AceCS1	CST	Valid
ACLY_pS455	CST	Caution
ACSL1	CST	Valid
ACVRL1	Invitrogen	Caution
ADAR1	Abcam	Valid
Akt	CST	Valid
Akt1	CST	Valid
Akt1_pS473	CST	Valid
Akt2	CST	Valid
Akt2_pS474	CST	Caution
Akt_pS473	CST	Valid
Akt_pT308	CST	Valid
ALKBH5	Abcam	Valid
Ambra1_pS52	MilliporeSigma5	Caution
AMPK-a2_pS345	CST	Caution
AMPKa	CST	Caution
AMPKa_pT172	Abcam	Valid
Annexin-I	BD Biosciences6	Valid
Annexin-VII	BD Biosciences	Valid
AR	CST	Valid
ARID1A	Sigma-Aldrich5	Caution
ASNS	Sigma-Aldrich	Valid
Atg3	CST	Valid
Atg4B	CST	Caution
Atg5	CST	Caution
Atg7	CST	Valid
ATM	CST	Valid
ATM_pS1981	CST	Valid
ATP5A	Abcam	Caution
ATP5H	Invitrogen	Valid
ATR	CST	Valid
ATRX	Abcam	Caution
ATR_pS428	Abcam	Caution
Aurora-A	CST	Caution
Aurora-ABC_pT288_pT232_pT198	CST	Caution
Aurora-B	Invitrogen	Valid
Axl	CST	Valid
b-Actin	CST	Caution
b-Catenin	CST	Valid
b-Catenin_pT41_S45	CST	Valid
B-Raf	CST	Caution
B-Raf_pS445	CST	Valid
B7-H3	CST	Caution
B7-H4	CST	Caution
Bad_pS112	CST	Valid
Bak	Epitomics/Abcam	Caution
BAP1	Santa Cruz	Valid
Bax	CST	Valid
Bcl-xL	CST	Valid
Bcl2	CST	Valid
BCL2A1	Abnova7	Valid
Beclin	ThermoFisher8	Caution
Bid	CST	Caution
Bim	CST	Valid
BiP-GRP78	BD Biosciences	Caution
BMK1-Erk5_pT218_Y220	Millipore	Valid
BRCA1	Millipore	Caution
BRD4	CST	Valid
c-Abl	CST	Valid
c-Abl_pY412	CST	Caution
c-IAP2	CST	Caution
c-Jun_pS73	CST	Valid
c-Kit	Abcam	Valid
c-Met_pY1234_Y1235	CST	Valid
c-Myc	Santa Cruz	Caution
C-Raf	Millipore	Caution
C-Raf_pS338	CST	Valid
CA9	CST	Caution
Calnexin	CST	Valid
Caspase-3-cleaved	CST	Caution
Caspase-7-cleaved-	CST	Caution
Caspase-8	CST	Red_Blob (**Used for QC**)
Caspase-8-cleaved	CST	Caution
Caveolin-1	CST	Valid
CD134	CST	Valid
CD171	Biolegend9	Valid
CD2	Santa Cruz	Caution
CD20	Invitrogen	Caution
CD26	Abcam	Valid
CD29	BD Biosciences	Valid
CD31	Dako10	Valid
CD38	Abcam	Caution
CD4	Abcam	Valid
CD44	CST	Caution
CD45	Dako	Valid
CD49b	BD Biosciences	Valid
CD5	Santa Cruz	Caution
CD68	R&D Systems11	Caution
CD74	Santa Cruz	Valid
cdc25C	CST	Valid
cdc2_pY15	CST	Caution
Cdc42	CST	Caution
Cdc6	CST	Valid
CDK1_pT14	Abcam	Caution
CDK9	CST	Valid
CDKN2A	CST	Caution
CDT1	CST	Valid
CENP-A	CST	Valid
cGAS	CST	Valid
CHD1L	CST	Valid
Chk1	CST	Caution
Chk1_pS296	Abcam	Valid
Chk1_pS345	CST	Caution
Chk2	CST	Valid
Chk2_pT68	CST	Caution
CIITA	CST	Caution
Claudin-7	Millipore	Valid
COG3	ProteinTech12	Valid
Collagen-VI	Santa Cruz	Valid
Complex-II-Subunit	Life Technologies13	Valid
Connexin-43	CST	Caution
Coup-TFII	CST	Caution
Cox-IV	CST	Valid
Cox2	CST	Valid
CRABP1	CST	Caution
CRABP2	Novus Biologicals14	Valid
Creb	CST	Caution
CREB_pS133	CST	Caution
CSK	CST	Caution
CtIP	CST	Valid
Cyclin-B1	Epitomics/Abcam	Valid
Cyclin-D1	Millipore Sigma	Caution
Cyclin-D3	CST	Valid
Cyclin-E1	CST	Valid
Cyclophilin-F	Abcam	Valid
D-a-Tubulin	Abcam	Valid
DAPK1_pS308	GeneTex15	Caution
DAPK2	Abcam	Caution
DDB-1	CST	Valid
DDR1	CST	Valid
DDR1_pY513	Millipore Sigma	Caution
DJ1	Abcam	Valid
DM-Histone-H3	Millipore	Valid
DM-K9-Histone-H3	Abcam	Valid
DNA-Ligase-IV	CST	Caution
POLG	CST	Valid
DNMT1	CST	Valid
DRP1	CST	Valid
DUSP4	CST	Valid
DUSP6	Abcam	Caution
Dvl3	CST	Valid
DYRK1B	CST	Caution
E-Cadherin	GeneTex	Valid
E2F1	CST	Valid
eEF2	CST	Caution
eEF2K	CST	Valid
EGFR	CST	Valid
EGFR_pY1173	Epitomics/Abcam	Valid
eIF4E	CST	Valid
eIF4E_pS209	Abcam	Valid
eIF4G	CST	Caution
Elk1_pS383	CST	Caution
EMA	DAKO	Caution
Enolase-1	CST	Valid
Enolase-2	CST	Valid
ENY2	GeneTex	Caution
EphA2	CST	Valid
EphA2_pS897	CST	Caution
EphA2_pY588	CST	Caution
ER-a	CST	Valid
ER-a_pS118	Epitomics/Abcam	Valid
ERCC1	CST	Caution
ERCC5	ProteinTech	Caution
Erk5	CST	Valid
ERRalpha	CST	Valid
Ets-1	Bethy Laboratories16	Valid
EVI1	CST	Valid
FABP5	ProteinTech	Caution
FAK	CST	Caution
FAK_pY397	CST	Valid
FANCD2	CST	Valid
FASN	CST	Valid
FGF-basic	PreproTech	Caution
Fibronectin	Epitomics/Abcam	Valid
FN14	CST	Caution
FOXM1	CST	Valid
FOXO3	CST	Valid
FoxO3a_pS318_S321	Biorbyt17	Valid
FRS2-alpha_pY196	Invitrogen	Valid
FTO	Abcam	Valid
G6PD	CST	Valid
Gab2	CST	Valid
GATA3	BD Biosciences	Valid
GATA6	CST	Valid
GCLM	Invitrogen	Valid
GCN5L2	CST	Valid
GGPS1	Santa Cruz	Valid
Gli1	CST	Caution
Gli3	Abcam	Valid
Glucocorticoid-Receptor	CST	Valid
Glutamate-D1-2	Novus	Valid
Glutaminase	Abcam	Caution
GRB2	CST	Valid
GRB7	Abcam	Valid
Grp75	CST	Caution
GSK-3a-b	Santa Cruz	Valid
GSK-3a-b_pS21_S9	CST	Valid
GSK-3B	CST	Caution
Gys	CST	Valid
Gys_pS641	CST	Valid
H2AX_pS139	CST	Caution
H2AX_pS140	Abcam	Caution
HER2	Lab Vision18	Valid
HER2_pY1248	R&D systems	Caution (likely sees pEGFR)
HER3	Santa Cruz	Valid
HER3_pY1289	CST	Caution
Heregulin	CST	Valid
HES1	CST	Valid
Hexokinase-I	CST	Caution
Hexokinase-II	Abcam	Valid
Hif-1-alpha	CST	Caution
Histone-H3	Abcam	Valid
Histone-H3_pS10	CST	Valid
HLA-DQA1	Abcam	Valid
HLA-DR-DP-DQ-DX	Invitrogen	Caution
HMHA1	ProteinTech	Valid
HNRNPK	CST	Valid
HSP27	CST	Caution
HSP27_pS82	CST	Valid
HSP60	CST	Valid
HSP70	CST	Caution
IDO	CST	Caution
IGF1R_pY1135_Y1136	CST	Valid
IGFBP2	CST	Valid
IGFRb	CST	Caution
IL-6	CST	Caution
IMP3	CST	Caution
INPP4b	CST	Caution
IR-b	CST	Caution
IRF-1	CST	Valid
IRF-3	CST	Valid
IRS1	MilliporeSigma	Valid
IRS2	CST	Caution
JAB1	Santa Cruz	Caution
Jagged1	Abcam	Valid
Jak2	CST	Valid
JNK2	Invitrogen	Valid
JNK_pT183_Y185	CST	Caution
KAP1	Abcam	Valid
KEAP1	CST	Valid
LAD1	Atlas Antibodies19	Valid
Lasu1	Bethyl	Valid
LC3A-B	CST	Caution
Lck	CST	Valid
LCN2	CST	Valid
LDHA	CST	Caution
LRP6_pS1490	CST	Valid
Lyn	CST	Valid
MACC1	CST	Valid
MAPK_pT202_Y204	CST	Caution
Mcl-1	CST	Valid
MCT4	Millipore	Valid
MDM2_pS166	Abcam	Valid
MEK1	Epitomics/Abcam	Valid
MEK1_pS217_S221	CST	Valid
MEK2	CST	Valid
MelanA	Abcam	Caution
Melanoma-gp100	Abcam	Caution
MERIT40	CST	Caution
MERIT40_pS29	CST	Valid
Merlin	Novus Biologicals	Caution
METTL3	Abcam	Valid
Midkine	Invitrogen	Valid
MIF	Santa Cruz	Caution
MIG6	CST	Valid
MITF	CST	Valid
Mitofusin-1	CST	Valid
Mitofusin-2	CST	Valid
MLH1	CST	Valid
MLKL	CST	Valid
MMP14	Abcam	Valid
MMP2	CST	Valid
Mnk1	CST	Valid
MR1	Santa Cruz	Caution
MRAP	Abcam	Caution
MSH2	CST	Caution
MSH6	Novus Biologicals	Caution
MSI2	Abcam	Caution
MTCO1	Abcam	Valid
mTOR	CST	Valid
mTOR_pS2448	CST	Caution
MTSS1	Novus Biologicals	Caution
MYH11	GeneTex	Caution
Myosin-IIa	CST	Caution
Myosin-IIa_pS1943	CST	Valid
Myt1	CST	Caution
N-Cadherin	CST	Valid
N-Ras	Santa Cruz	Valid
NAPSIN-A	Epitomics/Abcam	Caution
NDRG1_pT346	CST	Valid
NDUFB4	Invitrogen	Valid
NF-kB-p65_pS536	CST	Caution
Notch1	CST	Valid
Notch1-cleaved	CST	Valid
Notch3	Santa Cruz	Caution
NRF2	CST	Caution
Oct-4	CST	Caution
P-Cadherin	CST	Caution
p21	Invitrogen	Caution
p27-Kip1	Abcam	Valid
p27_pT157	R&D Systems	Caution
p27_pT198	Abcam	Valid
p38-a	CST	Valid
p38-MAPK	CST	Valid
p38-MAPK-_pT180_Y182	CST	Valid
p44-42-MAPK	CST	Valid
p53	CST	Caution
p70-S6K1	Epitomics/Abcam	Valid
p70-S6K_pT389	CST	Valid
p90RSK_pT573	Invitrogen	Caution
PAI-1	BD Biosciences	Valid
PAICS	Sigma-Aldrich	Caution
PAK1	CST	Valid
PAK4	Invitrogen	Valid
PAK_pS474_S602_S560	CST	Valid
PAK_pT423_T402	CST	Caution
PAR	Thermo Fisher/Trevigen	Caution
PARG	CST	Caution
PARP	CST	Valid
Patched	Abcam	Caution
PAX6	CST	Valid
PAX8	Novus Biologicals	Caution
Paxillin	CST	Caution
PCNA	CST	Caution
PD-1	GeneTex	Valid
PD-L1	CST	Caution
Pdcd4	Thermo Fisher/Rockland	Caution
PDH	Abcam	Valid
PDHA1	CST	Valid
PDHK1	CST	Caution
PDK1	CST	Valid
PDK1_pS241	CST	Valid
PEA-15	CST	Valid
PEA-15_pS116	Invitrogen	Valid
PERK	CST	Valid
PGM1	Abcam	Valid
PHGDH	CST	Caution
PHLPP	Proteintech	Valid
PI3K-p110-a	CST	Caution
PI3K-p110-b	Santa Cruz	Caution
PI3K-p85	Millipore	Caution
PIP4K2A	CST	Valid
PIP4K2B	CST	Valid
PKA-a	CST	Valid
PKC-a-b-II_pT638_T641	CST	Valid
PKC-b-II_pS660	CST	Valid
PKC-delta_pS664	Millipore	Valid
PKCa	CST	Valid
PKM2	CST	Caution
PLC-gamma1	CST	Valid
PLC-gamma1_pS1248	CST	Valid
PLC-gamma2_pY759	GeneTex	Valid
PLK1	CST	Caution
PMS2	Abcam	Valid
Porin	Abcam	Valid
PR	abcam	Valid
PRAS40	Life Technologies	Caution
PRC1_pT481	Aviva Systems Biology20	Caution
PREX1	Abcam	Valid
PTEN	CST	Valid
PTPN12	Abcam	Valid
Puma	CST	Caution
PYGB	Sigma-Aldrich	Valid
PYGM	Novus Biologicals	Caution
Pyk2_pY402	CST	Caution
Rab11	CST	Caution
Rab25	CST	Valid
Rad17_pS645	CST	Valid
Rad23A	CST	Caution
Rad50	CST	Valid
Rad51	Millipore	Caution
Raptor	CST	Valid
Rb	CST	Red_Blob (**Used for QC**)
RBM15	Novus Biologicals	Valid
Rb_pS807_S811	CST	Valid
Rheb	R&D Systems	Caution
Rictor	CST	Caution
Rictor_pT1135	CST	Valid
RIP	CST	Caution
RIP3	CST	Caution
RPA32	CST	Valid
RPA32_pS4_S8	Bethyl	Caution
RRM1	CST	Caution
RRM2	Life Technologies	Caution
RSK	CST	Caution
RSK1	CST	Valid
S100A4	CST	Valid
S6	CST	Valid
S6_pS235_S236	CST	Valid
S6_pS240_S244	CST	Valid
SCD	Santa Cruz	Valid
SDHA	CST	Valid
SF2	CST	Valid
SFRP1	CST	Valid
SGK1	CST	Valid
SGK3	CST	Valid
Shc_pY317	Bioss Antibodies21	Valid
SHP-2_pY542	CST	Caution
SHP2	CST	Valid
SIRP-alpha	Abcam	Valid
SLC1A5	Sigma-Aldrich	Caution
Slfn11	Santa Cruz	Caution
Smac	CST	Red_Blob (**Used for QC**)
Smad1	Epitomics/Abcam	Valid
Smad3	Epitomics/Abcam	Valid
Smad4	CST	Valid
Snail	CST	Red_Blob (**Used for QC**)
SOD1	CST	Valid
SOD2	CST	Valid
Sox17	Abcam	Valid
Sox2	CST	Valid
SOX7	Novus Biologicals	Valid
Src	Millipore	Valid
Src_pY416	CST	Valid
Src_pY527	CST	Valid
Stat1_pY701	CST	Valid
Stat3	CST	Caution
Stat3_pY705	Fisher	Caution
Stat5a	Epitomics/Abcam	Valid
Stathmin-1	Epitomics/Abcam	Valid
STING	CST	Valid
Syk	Santa Cruz	Valid
Synaptophysin	CST	Caution
Tau	Millipore	Caution
TAZ	CST	Valid
TEAD	CST	Caution
TFAM	CST	Valid
TFRC	Novus Biologicals	Valid
TIGAR	Epitomics/Abcam	Valid
Transglutaminase	Lab Vision	Valid
TRAP1	BD Biosciences	Valid
TRIM24	G-Biosciences22	Caution
TRIM25	Abcam	Caution
TRIP13	Invitrogen	Valid
TSC1	CST	Valid
TTF1	Epitomics/Abcam	Valid
Tuberin	Epitomics/Abcam	Valid
Tuberin_pT1462	Abcam	Valid
TUFM	Invitrogen	Valid
Twist	Santa Cruz	Caution
Tyro3	Novus Biologicals	Valid
U-Histone-H2B	CST	Caution
UBAC1	Sigma-Aldrich	Valid
UBQLN4	Santa Cruz	Caution
UGT1A	Santa Cruz	Valid
ULK1_pS757	CST	Caution
UQCRC2	MitoSciences/Abcam	Caution
UVRAG	CST	Caution
VASP	CST	Valid
VAV1	CST	Caution
VEGFR-2	CST	Valid
VEGFR-2_pY1175	CST	Caution
VHL	CST	Caution
VHL-EPPK1	BD Biosciences	Caution
Vinculin	Sigma-Aldrich	Valid
Wee1	CST	Caution
Wee1_pS642	CST	Caution
WIPI1	CST	Caution
WIPI2	CST	Caution
WTAP	Abcam	Valid
XBP-1	Santa Cruz	Caution
XIAP	CST	Caution
XPA	Santa Cruz	Valid
XPF	CST	Caution
XRCC1	Invitrogen	Caution
YAP	Santa Cruz	Caution
YAP_pS127	CST	Valid
YB1_pS102	CST	Valid
YES1	CST	Valid
YTHDF2	Abcam	Valid
YTHDF3	Abcam	Caution
ZAP-70	CST	Valid
ZEB1	CST	Valid
1 Cell Sigaling Technology (Danvers, MA)
2 Santa Cruz (Santa Cruz, CA)
3 Invitrogen (Carlsbad, CA)
4 Abcam (Waltham, MA)
5 MilliporeSigma (Burlington, MA)
6 BD Biosciences (San Jose, CA)
7Abnova (Walnut, CA)
8Thermo Fisher (Sugar Land, TX)
9Biolegend (San Diego, CA)
10 DAKO (Carpinteria, CA)
11R&D Systems (Minneapolis, MN)
12ProteinTech (Rosemont, IL)
13Life Technologies (Carlsbad, CA)
14Novus Biologicals (Centennial, CO)
15GeneTex (Irvine , CA)
16Bethyl Laboratories(Montgomery, TX)
17Biorbyt (St Louis, MO)
18Lab Vision (Fremont, CA)
19Atlas Antibodies (Lund, Sweden)
20Aviva Systems Biology (San Diego, CA)
21Bioss Antibodies (Woburn, MA)
22 G-Biosciences (St Louis, MO)
